# Supplementary material
Source: publisher figshare collection journal article supplement (https://gsajournals.figshare.com/articles/dataset/_/5991208)
Supplement: Supplementary file 4 [file 2]

**Table S1 Literature review of MMR proteins overexpressed in cancers**

| Reference                      | MMR genes/proteins overexpressed | Techniques used                                                                                   | Summary of findings                                                                                                                                                                                                                                                                                                                                                                                                                                                                                                                                                                    |
|--------------------------------|----------------------------------|---------------------------------------------------------------------------------------------------|----------------------------------------------------------------------------------------------------------------------------------------------------------------------------------------------------------------------------------------------------------------------------------------------------------------------------------------------------------------------------------------------------------------------------------------------------------------------------------------------------------------------------------------------------------------------------------------|
| Wilczak <i>et al.</i> (2017)   | MSH6, PMS2, MLH1                 | Immuno-histochemistry (IHC) of 11152 prostate cancer specimens.<br><br>Deletions measured by FISH | 47% samples showed strong Msh6 overexpression, 31.6% showed strong Pms1 overexpression and 39.2% showed strong Mlh1 expression. Staining intensity in normal prostate epithelium ranged from negative to moderate and was typically negative to weak.<br><br>MSH6, MLH1 and PMS2 expression is particularly strong in cancers with advanced pathological tumor stage, high gleason grade, nodal metastasis and early biochemical recurrence.<br><br>High levels of MMR gene expression paralleled features of genetic instability, such as the number of genomic deletions per cancer. |
| Kauffmann <i>et al.</i> (2008) | <i>MSH6, MSH2, PCNA, EXO1</i>    | Microarray in 60 + or - metastasis melanoma samples.                                              | DNA repair and replication genes such as <i>MSH2, MSH6, EXO1, PCNA</i> were overexpressed in samples that underwent metastasis compared to those that did not.                                                                                                                                                                                                                                                                                                                                                                                                                         |
| Jewell <i>et al.</i> (2010)    | <i>MSH2, MSH6</i>                | Microarray in 472 melanoma samples                                                                | <i>MSH2</i> and <i>MSH6</i> are significantly overexpressed in tumors with higher mitotic rate and greater Breslow thickness.                                                                                                                                                                                                                                                                                                                                                                                                                                                          |
| Stark <i>et al.</i> (2015)     | MSH6                             | IHC in 211 glioblastoma samples                                                                   | Expression of MSH6 was significantly associated with proliferation but not with survival.                                                                                                                                                                                                                                                                                                                                                                                                                                                                                              |
| Huang <i>et al.</i> (2017)     | MSH2, MLH1                       | IHC of 120 colon cancer samples                                                                   | Overexpression of MLH1 and MSH2 is associated with shorter and longer survival of patients respectively.<br><br>MLH1 is more frequently overexpressed in metastasis group compared to non-metastasis group.                                                                                                                                                                                                                                                                                                                                                                            |

|                              |                               |                                                   |                                                                                                                                                                                                                                                                                                                                            |
|------------------------------|-------------------------------|---------------------------------------------------|--------------------------------------------------------------------------------------------------------------------------------------------------------------------------------------------------------------------------------------------------------------------------------------------------------------------------------------------|
| Wagner <i>et al.</i> (2016)  | MSH2, MSH6                    | IHC of 115 oral squamous cell carcinomas          | <p>High MSH2 and MSH6 expression was found in 59.1% and 46.5% cases, respectively. 27.8% exhibited high MSH2 and MSH6 expression simultaneously.</p> <p>MSH2 expression levels were significantly correlated with the levels of MSH6.</p> <p>MSH6 and MutS<math>\alpha</math> overexpression were associated with poor survival rates.</p> |
| Vageli <i>et al.</i> (2012)  | <i>MSH2, MSH6, MLH1, PMS2</i> | Real time qPCR of 23 urothelial cell carcinomas   | <p>Overexpression of <i>MSH2, MSH6, MLH1, PMS1</i> mRNA expression in 47.8%, 30%, 35% and 30% of cases.</p> <p><i>MSH2</i> and <i>MSH6</i> expression were correlated; <i>MSH2</i> and <i>MLH1</i> expression were correlated.</p>                                                                                                         |
| Li <i>et al.</i> (2013)      | MSH2, MLH1, PCNA              | IHC of 181 Non-small cell lung cancer             | The expression of MLH1, MSH2 and PCNA increased in cancers with EGFR mutations.                                                                                                                                                                                                                                                            |
| Norris <i>et al.</i> (2007)  | PMS2                          | IHC of 33 tumors from 19 prostate cancer patients | <p>Increase in PMS2 levels was identified in prostate cancer tissue.</p> <p>Prostate tumors with elevated levels of PMS2 were genetically unstable (MSI), which was corrected by MLH1 co-elevation.</p>                                                                                                                                    |
| Norris <i>et al.</i> (2009)  | PMS2                          | Quantitative IHC of 166 prostate cancer patients  | <p>PMS2 expression elevated in 67% of patients and correlated with tumor volume.</p> <p>PMS2 expression higher in recurrent patients, compared to non-recurrent patients.</p> <p>PMS2 expression shown to be a predictor of time-to-recurrence after surgery.</p>                                                                          |
| Velasco <i>et al.</i> (2002) | MSH2                          | IHC from 101 prostate cancer patients             | <p>Increased MSH2 expression observed in 32% of benign prostatic hyperplasia and 71% of cancer specimens compared to normal glands.</p> <p>Microsatellite instability detected in 26% of moderate to high staining MSH2 prostate carcinoma specimens.</p>                                                                                  |

|                                 |            |                                      |                                                                                                                                                                                                             |
|---------------------------------|------------|--------------------------------------|-------------------------------------------------------------------------------------------------------------------------------------------------------------------------------------------------------------|
|                                 |            |                                      | Decreased risk of recurrence correlated with absent to low MSH2 staining in malignant prostate tissue.                                                                                                      |
| Li M <i>et al.</i> (2008)       | MSH2, MLH1 | IHC of 191 gastric cancers           | Overexpression of MLH1 and/or MSH2 was observed and linked to tumor aggressiveness.                                                                                                                         |
| Srivastava <i>et al.</i> (2004) | MSH2       | IHC of 55 glioblastomas              | Significantly higher expression of MSH2 protein in high grade as compared with low grade primary human gliomas. No such difference was observed for MLH1.                                                   |
| Castrilli <i>et al.</i> (2002)  | MSH2, MLH1 | IHC of 43 salivary gland tumors      | Malignant tumors contained significantly higher proportions of MSH2 and MLH1 positive cells compared to pleomorphic adenomas.                                                                               |
| Friedrich <i>et al.</i> (1999)  | MSH2       | IHC of 40 ovarian carcinomas         | All ovarian carcinomas analyzed revealed moderate to strong MSH2 staining as compared to normal ovarian tissue which showed negative to weak staining.                                                      |
| Leach <i>et al.</i> (2000)      | MSH2       | IHC of 17 urothelial carcinomas      | Increased expression of MSH2 was detected in all tumors examined.                                                                                                                                           |
| Hamid <i>et al.</i> (2002)      | MSH2, PCNA | IHC of 27 endometrial carcinomas     | 62.5% of tumor samples showed moderately to markedly stronger expression of MSH2 and PCNA than in normal proliferative endometrial glandular cells.<br><br>MSH2 expression correlated with PCNA expression. |
| Rass <i>et al.</i> (2001)       | MSH2       | IHC and RT-PCR of melanocytic tumors | Higher protein expression and mRNA levels of hMSH2 in aggressive, malignant melanocytic tumors was seen. Levels of MSH2 were not correlated with the proliferation marker Ki-67.                            |

---

Summary of studies that have found various MMR genes or proteins to be overexpressed in a variety of cancers and outcomes they have been linked to.
