# Supplementary material
Source: publisher figshare collection journal article supplement (https://gsajournals.figshare.com/articles/dataset/_/5991208)

*MSH2*

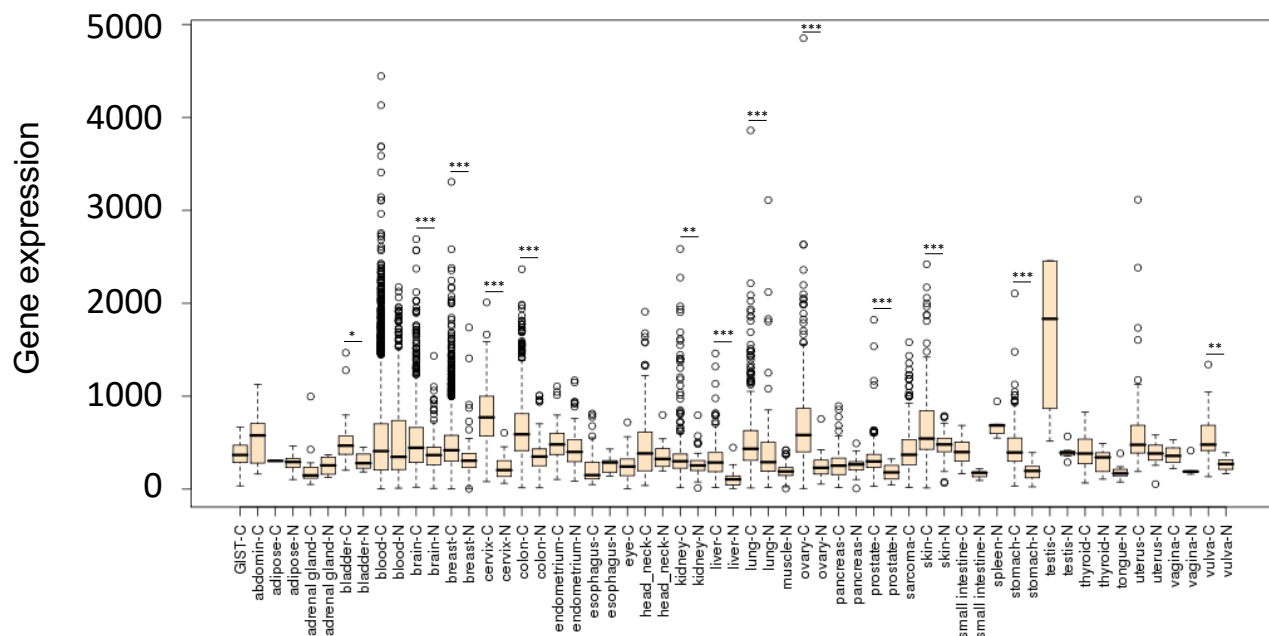

*MSH6*

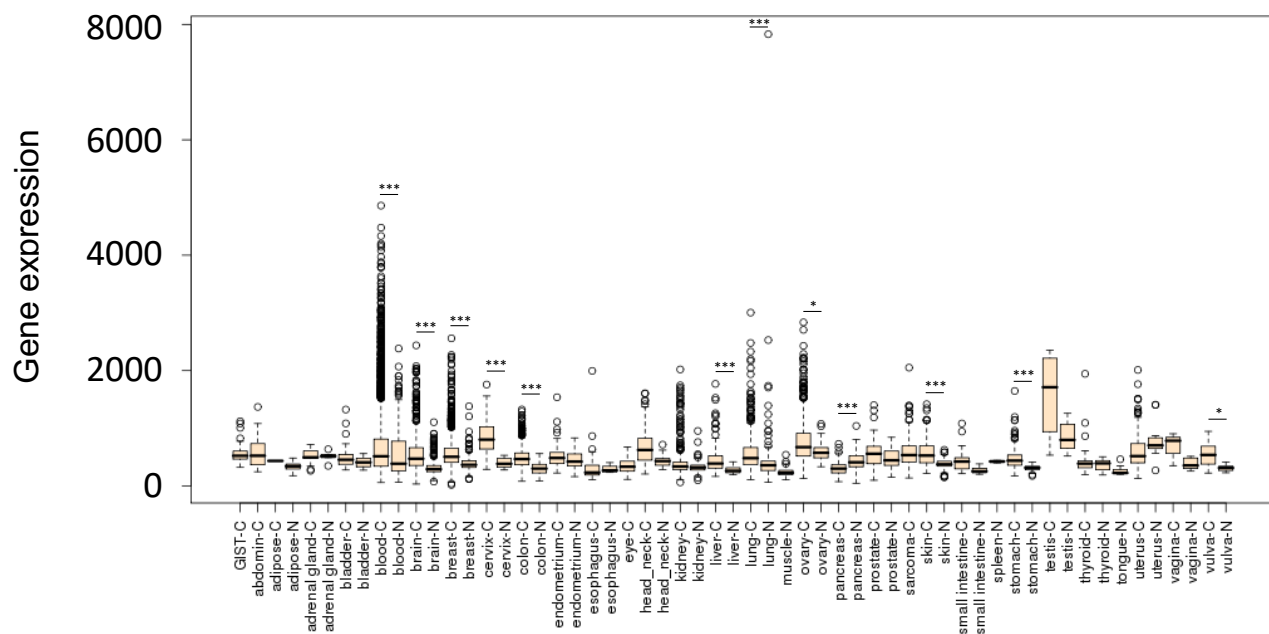

*MSH3*

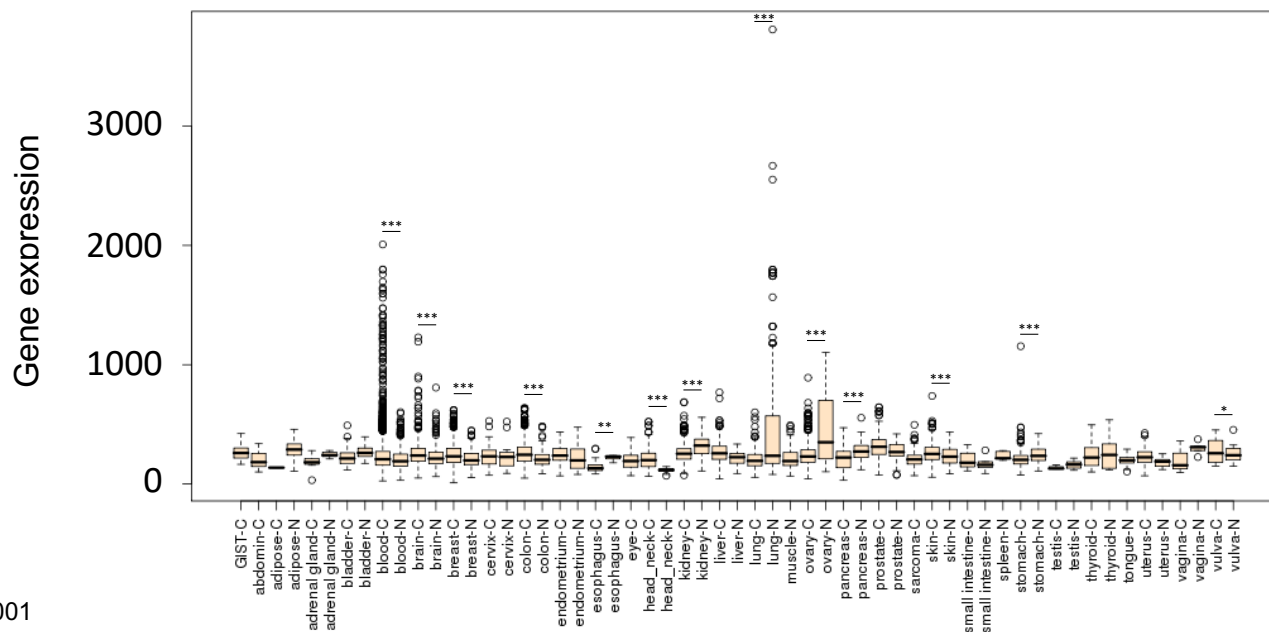

\*  $p < 0.05$   
 \*\*  $p < 0.01$   
 \*\*\*  $p < 0.001$

Figure S1

Supplement: Supplementary file 2 [file 2]

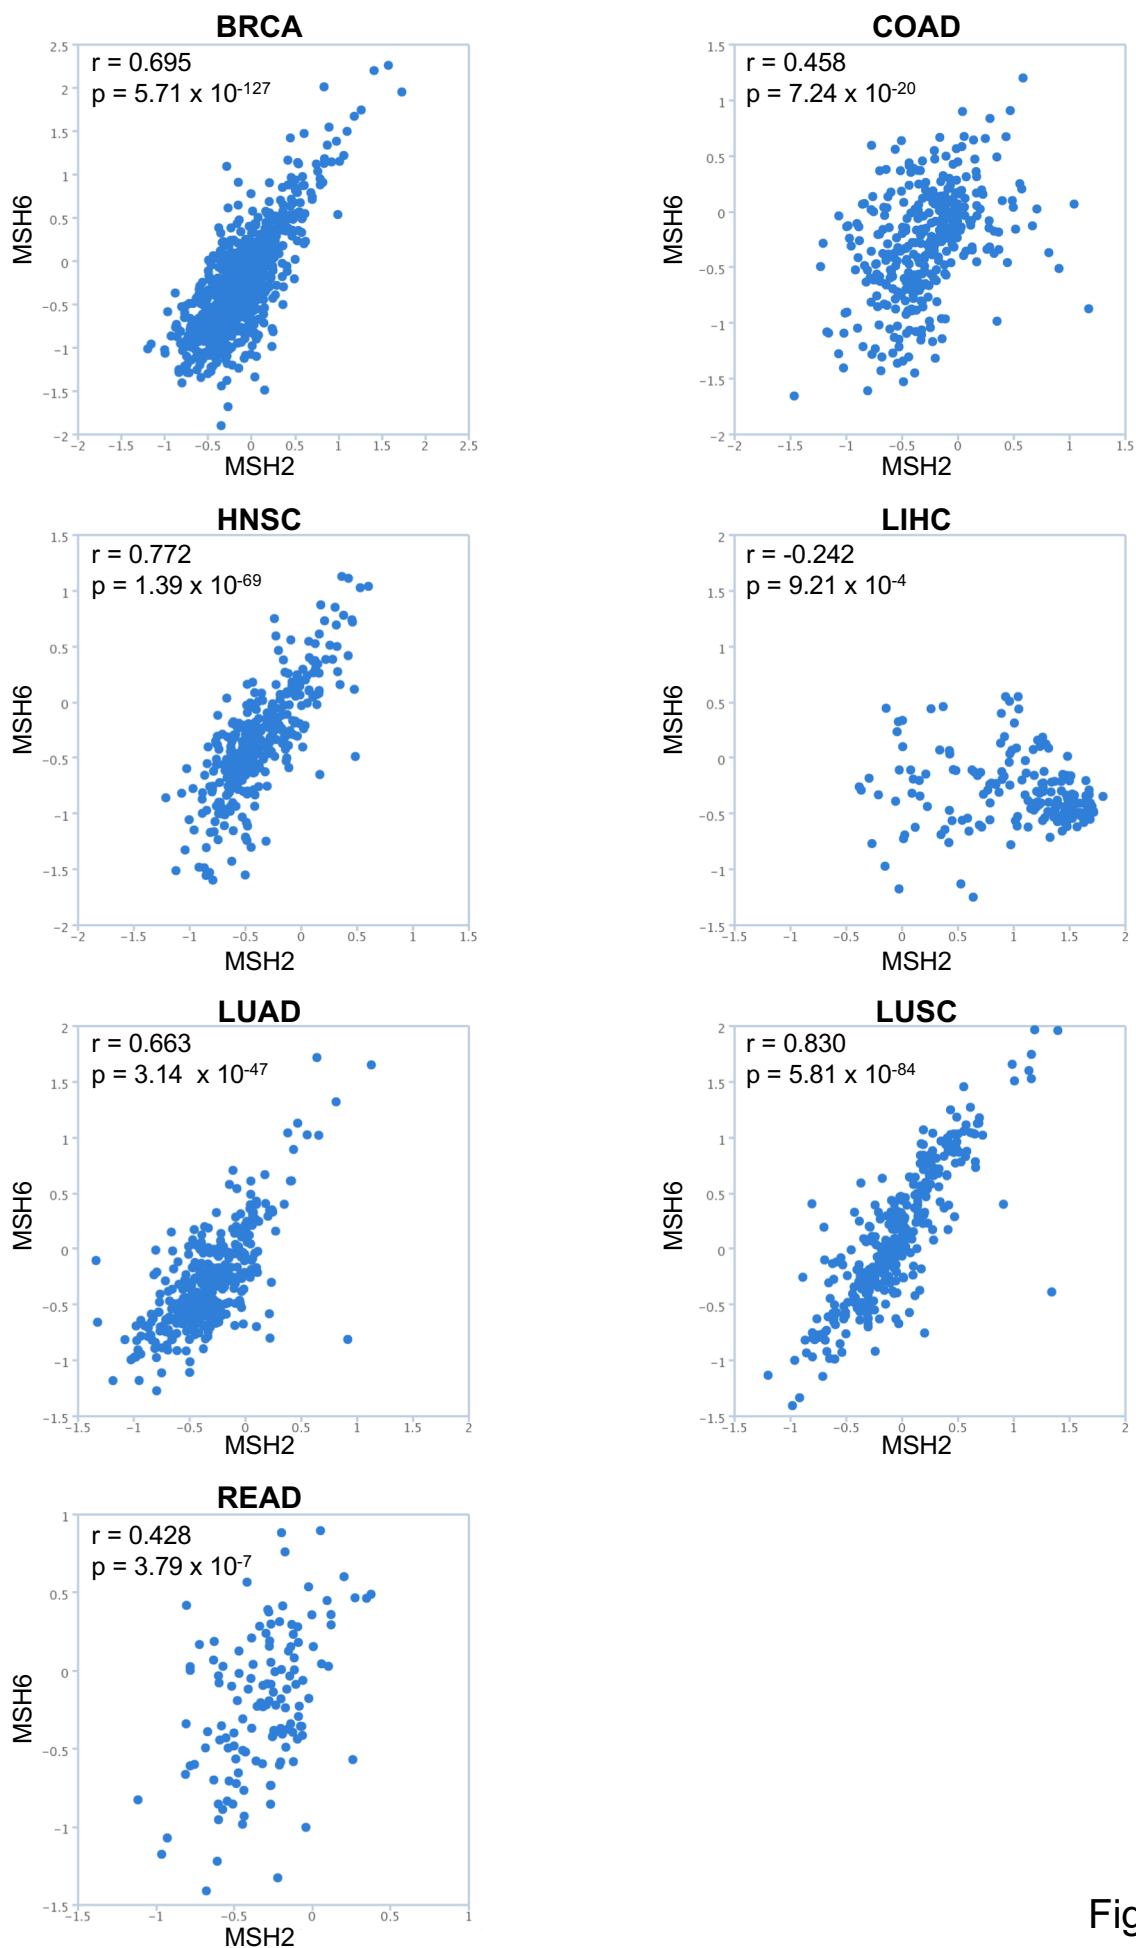

Figure S2

Supplement: Supplementary file 3 [file 2]
